# Supplementary material for: Expression and Prognostic Evaluation of the Receptor Tyrosine Kinase MET in Canine Malignant Melanoma
Source: MDPI journal article supplement (doi:10.3390/vetsci10040249), 2023-03-26
Supplement: s1 [file s1]

# Supplemental Materials

**Table S1.** Summary of Relevant Clinical Data for Included 30 Cases

| Study ID | Gender <sup>1</sup> | Breed               | Weight (kg) <sup>2</sup> | Age (year) <sup>2</sup> | Tumor type | Anatomic location                              | Met Score | LN metastasis <sup>3</sup> | Distant metastasis | Treatment      | Survival time (days) |
|----------|---------------------|---------------------|--------------------------|-------------------------|------------|------------------------------------------------|-----------|----------------------------|--------------------|----------------|----------------------|
| C01      | FS                  | Rottweiler          | 34.0                     | 2                       | Accral     | L front 5th digit                              | 1         | Y                          | Y                  | Sx             | Lost to follow-up    |
| C02      | FS                  | German Shepherd     | 29.4                     | 13                      | Oral       | Palatal to left maxillary canine (205)         | 0         | N                          | N                  | Sx and Vaccine | 70                   |
| C03      | FS                  | Labrador Retriever  | 28.4                     | 14                      | Oral       | R mandibular lingual mucosa between PM1 and M1 | 1         | N                          | N                  | Sx and RT      | 288                  |
| C04      | FS                  | Shar Pei            | 28.1                     | 15                      | Oral       | Lingual - R dorsal surface                     | 0         | Y - Suspected              | Y                  | RT             | 322                  |
| C05      | FS                  | Shih Tzu            | 5.6                      | 9                       | Cutaneous  | dermal/ SQ L perianal mass                     | 0         | N                          | N                  | Sx and RT      | 329                  |
| C07      | FS                  | Giant Schnauzer     | 42.5                     | 11                      | Cutaneous  | R lateral antebrachium                         | 1         | N                          | N                  | None           | Lost to follow-up    |
| C08      | MN                  | Mixed               | 37.6                     | 8                       | Oral       | R lateral mandible around 408                  | 2         | N                          | N                  | Sx and Vaccine | Lost to follow-up    |
| C09      | FS                  | Labrador Retriever  | 23.1                     | 15                      | Accral     | L hind 3rd digit                               | 1         | N                          | Y                  | Sx and Vaccine | Lost to follow-up    |
| C10      | FS                  | Miniature Schnauzer | 9.6                      | 8                       | Accral     | R front 3rd digit                              | 2         | N                          | Y                  | Sx and Vaccine | 829                  |

| Study ID | Gender <sup>1</sup> | Breed                | Weight (kg) <sup>2</sup> | Age (year) <sup>2</sup> | Tumor type | Anatomic location                                          | Met Score | LN metastasis <sup>3</sup> | Distant metastasis         | Treatment              | Survival time (days) |
|----------|---------------------|----------------------|--------------------------|-------------------------|------------|------------------------------------------------------------|-----------|----------------------------|----------------------------|------------------------|----------------------|
| C11      | FS                  | Standard Poodle      | 24.4                     | 11                      | Accral     | L hind 2nd digit                                           | 0         | N                          | N                          | Sx and Vaccine         | Lost to follow-up    |
| C15      | MN                  | Golden Retriever     | 33.8                     | 12                      | Oral       | Gingiva around 208 and 209                                 | 1         | N                          | Y - Suspected <sup>4</sup> | Sx and RT              | 463                  |
| C16      | MI                  | Labrador Retriever   | 25.4                     | 12                      | Oral       | Caudal to 109/110                                          | 0         | N                          | N                          | Sx and Vaccine         | 657                  |
| C17      | FS                  | German Shepherd      | 28.0                     | 10                      | Cutaneous  | R metacarpal pad                                           | 1         | N                          | Y                          | Sx and Vaccine         | Lost to follow-up    |
| C18      | MN                  | Scottish Terrier     | 12.3                     | 11                      | Oral       | R upper lip mucosa                                         | 1         | N                          | N                          | Sx                     | 1023                 |
| C21      | MN                  | Basset Hound         | 36.7                     | 12                      | Oral       | R maxillary gingiva above 106                              | 1         | N                          | N                          | None                   | 41                   |
| C22      | MN                  | Golden Retriever     | 40.8                     | 7                       | Oral       | Sublingual                                                 | 0         | Y - Suspected              | N                          | Sx and Vaccine         | Lost to follow-up    |
| C23      | FS                  | Gordon Setter        | 14.7                     | 9                       | Oral       | Mucocutaneous junction of R maxillary lip                  | 1         | N                          | N                          | Sx and Vaccine         | Lost to follow-up    |
| C24      | MN                  | Bernese Mountain Dog | 47.2                     | 7                       | Cutaneous  | Ventral L thorax at the level of the 8th intercostal space | 0         | N                          | N                          | Sx, Vaccine, and Chemo | Lost to follow-up    |
| C25      | FS                  | Gordon Setter        | 29.0                     | 11                      | Oral       | Gingiva on lingual aspect of 408 and 409                   | 1         | Y - Suspected              | Y                          | Sx, Vaccine, and Chemo | 193                  |

| Study ID | Gender <sup>1</sup> | Breed              | Weight (kg) <sup>2</sup> | Age (year) <sup>2</sup> | Tumor type | Anatomic location                                                           | Met Score | LN metastasis <sup>3</sup> | Distant metastasis         | Treatment              | Survival time (days) |
|----------|---------------------|--------------------|--------------------------|-------------------------|------------|-----------------------------------------------------------------------------|-----------|----------------------------|----------------------------|------------------------|----------------------|
| C26      | FS                  | Saint Bernard      | 68.8                     | 11                      | Oral       | L mandibular lip                                                            | 0         | N                          | Y                          | Sx, Vaccine, and Chemo | 58                   |
| C27      | FS                  | Labrador Retriever | 26.2                     | 12                      | Oral       | L mandibular buccal gingiva                                                 | 0         | Y                          | N                          | Sx and RT              | 434                  |
| C28      | MN                  | Labrador Retriever | 39.6                     | 13                      | Oral       | Rostral mand lingual region around incisors                                 | 0         | Unknown                    | Unknown                    | None                   | Lost to follow-up    |
| C29      | FS                  | Yorkshire Terrier  | 3.2                      | 13                      | Oral       | L mandible extending from 305 caudally                                      | 0         | N                          | Y - Suspected <sup>5</sup> | Sx and RT              | 130                  |
| C30      | MN                  | Golden Retriever   | 37.1                     | 10                      | Oral       | dorsolateral pharynx near tonsil, along R mandibular ramus involving palate | 1         | N                          | Y                          | RT                     | 455                  |
| C32      | MN                  | Pit Bull Terrier   | 40.4                     | 8                       | Oral       | R caudal maxilla                                                            | 1         | N                          | Y                          | Sx and RT              | 427                  |
| C33      | FS                  | German Shepherd    | 41.6                     | 13                      | Oral       | Caudal soft palate                                                          | 1         | N                          | Y - Suspected <sup>6</sup> | Sx and RT              | 224                  |
| C34      | MN                  | Labrador Retriever | 39.7                     | 10                      | Oral       | R cd hard palate and soft palate in the region of 108 - 110                 | 1         | N                          | N                          | Sx and RT              | Lost to follow-up    |
| C35      | MN                  | Giant Schnauzer    | Unknown                  | 4                       | Accral     | R front digit 3                                                             | 1         | Unknown                    | Y                          | Sx and Vaccine         | 290                  |

| Study ID | Gender <sup>1</sup> | Breed           | Weight (kg) <sup>2</sup> | Age (year) <sup>2</sup> | Tumor type | Anatomic location                     | Met Score | LN metastasis <sup>3</sup> | Distant metastasis | Treatment      | Survival time (days) |
|----------|---------------------|-----------------|--------------------------|-------------------------|------------|---------------------------------------|-----------|----------------------------|--------------------|----------------|----------------------|
| C37      | FS                  | German Shepherd | 39.9                     | 8                       | Cutaneous  | L pinna - marginal cutaneous flap     | 1         | Unknown                    | Unknown            | Sx             | Alive                |
| C38      | FS                  | Cocker Spaniel  | 7.1                      | 9                       | Oral       | L mandibular gingiva near 305 and 306 | 2         | Unknown                    | Unknown            | Sx and Vaccine | Alive                |

1. FS = female spayed; MN = male neutered; MI = male intact

2. Weight and age at time of diagnosis

3. Suspected metastasis from LN palpation without cytologic support

4. Lytic bone lesion on mid-diaphysis of L radius on radiographs

5. Cutaneous melanoma on punch biopsy

6. Two round soft tissue opacities on thoracic radiographs may represent pulmonary metastasis or superimposition of structure

**Table S2.** Treatments elected among the 30 cases reviewed

| Treatment                          | No. of Cases | % of Total Cases |
|------------------------------------|--------------|------------------|
| Surgery and vaccine                | 11           | 36.70%           |
| Surgery and radiation therapy      | 8            | 26.70%           |
| Surgery only                       | 3            | 10.00%           |
| Surgery, vaccine, and chemotherapy | 3            | 10.00%           |
| No treatment                       | 3            | 10.00%           |
| Radiation therapy only             | 2            | 6.70%            |

**Table S3.** Univariate analysis of histologic features and Met scores for all canine melanomas

| Histologic Feature                                 | Values | Overall Met scores |     |     |         |
|----------------------------------------------------|--------|--------------------|-----|-----|---------|
|                                                    |        | 0                  | 1   | 2   | p-value |
| Degree of pigmentation (count)                     | <50%   | 6                  | 11  | 2   | 0.52    |
|                                                    | >50%   | 5                  | 5   | 1   |         |
| Presence of ulceration (count)                     | N      | 4                  | 3   | 1   | 0.57    |
|                                                    | Y      | 7                  | 13  | 2   |         |
| Presence of necrosis (count)                       | N      | 8                  | 13  | 2   | 0.92    |
|                                                    | Y      | 3                  | 3   | 1   |         |
| Presence of deep inflammation (count) <sup>1</sup> | N      | 6                  | 6   | 1   | 0.41    |
|                                                    | Y      | 4                  | 6   | 2   |         |
| Median mitotic index <sup>2</sup>                  | --     | 3                  | 3.5 | 2   | 0.95    |
| Median minimum Breslow thickness (mm)              | --     | 10                 | 4.4 | 3.7 | 0.79    |

1. 5 cases (4 orals and 1 acral) were not able to be classified due to lack of inflammation or tumor extension to tissue margin

2. Mitotic index = mitotic count per 10 high power fields

**Table S4.** Univariate analysis of histologic features and Met scores for oral canine melanomas

| Histologic Feature                                 | Values | Oral melanoma Met scores |     |     |         |
|----------------------------------------------------|--------|--------------------------|-----|-----|---------|
|                                                    |        | 0                        | 1   | 2   | p-value |
| Degree of pigmentation (count)                     | <50%   | 4                        | 7   | 1   | 0.67    |
|                                                    | >50%   | 4                        | 3   | 1   |         |
| Presence of ulceration (count)                     | N      | 3                        | 0   | 1   | 0.48    |
|                                                    | Y      | 5                        | 10  | 1   |         |
| Presence of necrosis (count)                       | N      | 7                        | 7   | 2   | 0.86    |
|                                                    | Y      | 1                        | 3   | 0   |         |
| Presence of deep inflammation (count) <sup>1</sup> | N      | 5                        | 2   | 1   | 0.27    |
|                                                    | Y      | 2                        | 5   | 1   |         |
| Median mitotic index <sup>2</sup>                  | --     | 2                        | 4.5 | 1   | 0.6     |
| Median minimum Breslow thickness (mm)              | --     | 9.5                      | 4.7 | 3.4 | 0.86    |

1. 5 cases (4 orals and 1 acral) were not able to be classified due to lack of inflammation or tumor extension to tissue margin

2. Mitotic index = mitotic count per 10 high power fields

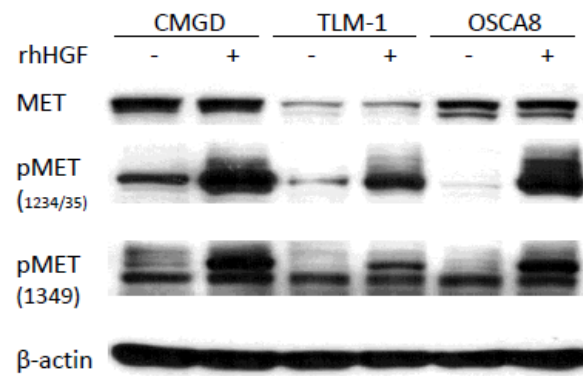

**Figure S1.** Recombinant human HGF (rhHGF) induces MET activation. CMGD-2 and TLM-1 are canine melanoma cell lines and OSCA-8 is a canine osteosarcoma cell line, used as positive control. All the experiments were performed after serum starvation and then stimulated with rhHGF (+) or untreated (-).

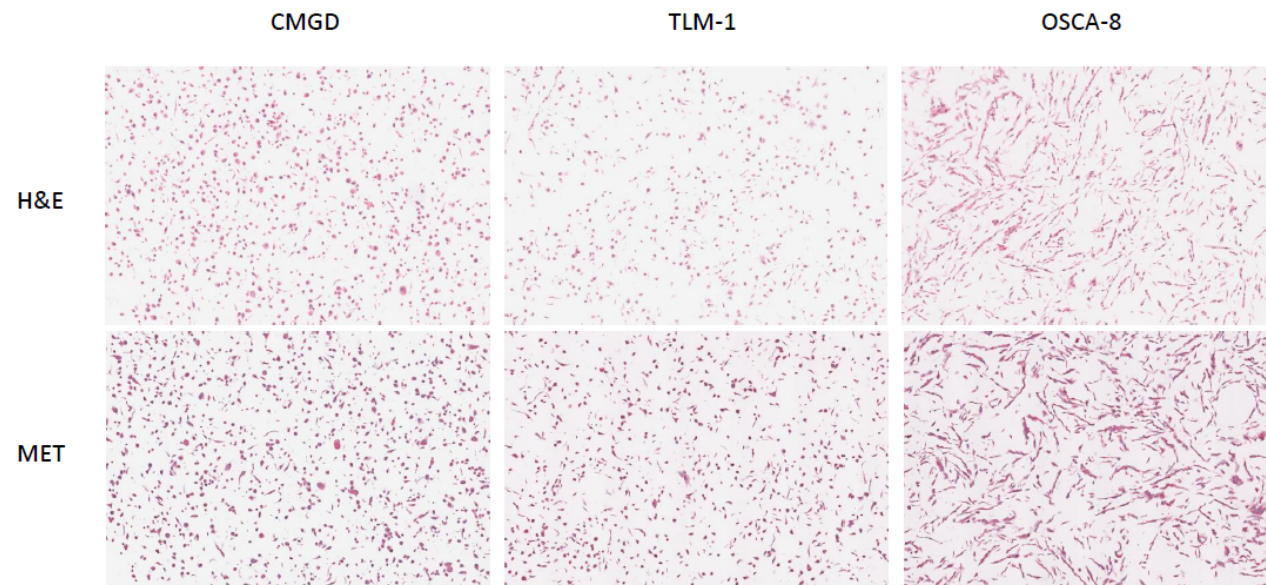

**Figure S2.** Confirmed immunopositivity with H&E staining and MET immunohistochemistry performed on cell pallets created from canine melanoma cell lines CMGD-2 and TLM-1 and canine osteosarcoma cell line OSCA-8 as positive control.
